# Supplementary material for: Kocurin, the True Structure of PM181104, an Anti-Methicillin-Resistant Staphylococcus aureus (MRSA) Thiazolyl Peptide from the Marine-Derived Bacterium Kocuria palustris
Source: MDPI journal article supplement (doi:10.3390/md11020387), 2013-02-04
Supplement: s2 [file s2]

marinedrugs-11-00387-s001.mol
  corina  05201404113D 1   1.00000     0.00000 
CORINA 3.49 0023  12.04.2013
105116  0  0  0  0  0  0  0  0999 V2000
   -6.1500    9.2072    8.0634 C   0  0  0  0  0  0  0  0  0  0  0  0
   -5.6408    7.9703    8.4122 C   0  0  0  0  0  0  0  0  0  0  0  0
   -5.3999   10.3486    8.2769 C   0  0  0  0  0  0  0  0  0  0  0  0
   -4.1406   10.2530    8.8390 C   0  0  0  0  0  0  0  0  0  0  0  0
   -3.6316    9.0161    9.1881 C   0  0  0  0  0  0  0  0  0  0  0  0
   -4.3816    7.8747    8.9743 C   0  0  0  0  0  0  0  0  0  0  0  0
   -6.7567    3.5291    7.7790 S   0  0  0  0  0  0  0  0  0  0  0  0
   -6.8862    4.8720    6.6222 C   0  0  0  0  0  0  0  0  0  0  0  0
   -6.1590    6.1714    6.7859 C   0  0  0  0  0  0  0  0  0  0  0  0
   -6.4588    6.7260    8.1800 C   0  0  0  0  0  0  0  0  0  0  0  0
   -7.6805    4.5496    5.6772 N   0  0  0  0  0  0  0  0  0  0  0  0
   -6.5243    7.1902    5.7864 N   0  0  0  0  0  0  0  0  0  0  0  0
   -8.3311    3.2579    5.6811 C   0  0  0  0  0  0  0  0  0  0  0  0
   -7.9042    2.4217    6.8990 C   0  0  0  0  0  0  0  0  0  0  0  0
   -9.8270    3.4407    5.7171 C   0  0  0  0  0  0  0  0  0  0  0  0
  -10.5079    3.4761    4.5348 N   0  0  0  0  0  0  0  0  0  0  0  0
  -11.9807    3.6079    4.6380 C   0  0  0  0  0  0  0  0  0  0  0  0
  -12.5417    3.6137    3.2379 C   0  0  0  0  0  0  0  0  0  0  0  0
  -11.9616    4.2225    2.3639 O   0  0  0  0  0  0  0  0  0  0  0  0
   -5.6004    8.1529    5.6033 C   0  0  0  0  0  0  0  0  0  0  0  0
   -4.4846    7.8931    6.0119 O   0  0  0  0  0  0  0  0  0  0  0  0
   -5.7527    9.4619    4.9831 C   0  0  0  0  0  0  0  0  0  0  0  0
   -6.8340    9.9581    4.3878 N   0  0  0  0  0  0  0  0  0  0  0  0
   -4.7000   10.3306    4.9983 C   0  0  0  0  0  0  0  0  0  0  0  0
   -5.1653   11.7766    4.2277 S   0  0  0  0  0  0  0  0  0  0  0  0
   -6.7390   11.1611    3.9428 C   0  0  0  0  0  0  0  0  0  0  0  0
  -14.5299    2.2410    3.9070 C   0  0  0  0  0  0  0  0  0  0  0  0
  -13.6756    2.9529    2.9450 N   0  0  0  0  0  0  0  0  0  0  0  0
  -12.3356    4.9180    5.3439 C   0  0  0  0  0  0  0  0  0  0  0  0
  -13.8257    4.9852    5.5589 C   0  0  0  0  0  0  0  0  0  0  0  0
  -14.3766    4.5000    6.7305 C   0  0  0  0  0  0  0  0  0  0  0  0
  -15.7422    4.5604    6.9299 C   0  0  0  0  0  0  0  0  0  0  0  0
  -16.5610    5.1086    5.9534 C   0  0  0  0  0  0  0  0  0  0  0  0
  -16.0058    5.5948    4.7786 C   0  0  0  0  0  0  0  0  0  0  0  0
  -14.6390    5.5372    4.5864 C   0  0  0  0  0  0  0  0  0  0  0  0
  -15.4885    1.3424    3.1120 C   0  0  0  0  0  0  0  0  0  0  0  0
  -15.1128    1.5187    1.6296 C   0  0  0  0  0  0  0  0  0  0  0  0
  -14.2518    2.8032    1.6080 C   0  0  0  0  0  0  0  0  0  0  0  0
  -10.4123    3.5543    6.7732 O   0  0  0  0  0  0  0  0  0  0  0  0
  -17.9048    5.1688    6.1470 O   0  0  0  0  0  0  0  0  0  0  0  0
   -9.7268   11.7467    1.9393 C   0  0  0  0  0  0  0  0  0  0  0  0
   -8.8766   11.1207    2.6931 N   0  0  0  0  0  0  0  0  0  0  0  0
   -7.8139   11.9799    3.2885 C   0  0  0  0  0  0  0  0  0  0  0  0
   -9.2455   12.8634    1.9521 O   0  0  0  0  0  0  0  0  0  0  0  0
   -8.4451   12.9014    4.3341 C   0  0  0  0  0  0  0  0  0  0  0  0
   -9.1594   12.0714    5.3695 C   0  0  0  0  0  0  0  0  0  0  0  0
   -9.7044   12.6647    6.4499 N   0  0  0  0  0  0  0  0  0  0  0  0
   -9.2438   10.8696    5.2305 O   0  0  0  0  0  0  0  0  0  0  0  0
  -15.1475    3.9777    1.2976 C   0  0  0  0  0  0  0  0  0  0  0  0
  -14.7773    5.1694    0.9532 N   0  0  0  0  0  0  0  0  0  0  0  0
  -15.7012    6.0291    0.6190 C   0  0  0  0  0  0  0  0  0  0  0  0
  -16.9845    5.5531    0.8361 C   0  0  0  0  0  0  0  0  0  0  0  0
  -16.8542    3.8914    1.3792 S   0  0  0  0  0  0  0  0  0  0  0  0
  -15.7028    7.3501   -0.0502 C   0  0  0  0  0  0  0  0  0  0  0  0
  -16.9802    7.6075   -1.2599 S   0  0  0  0  0  0  0  0  0  0  0  0
  -16.4112    9.2285   -1.5246 C   0  0  0  0  0  0  0  0  0  0  0  0
  -15.3430    9.4770   -0.6609 C   0  0  0  0  0  0  0  0  0  0  0  0
  -14.9949    8.4333    0.0411 N   0  0  0  0  0  0  0  0  0  0  0  0
  -10.8563   11.9685    1.1090 C   0  0  0  0  0  0  0  0  0  0  0  0
  -10.9691   13.1410    0.3855 C   0  0  0  0  0  0  0  0  0  0  0  0
  -12.1012   13.0938   -0.2800 O   0  0  0  0  0  0  0  0  0  0  0  0
  -12.7393   11.9095    0.0516 C   0  0  0  0  0  0  0  0  0  0  0  0
  -11.9715   11.2451    0.8350 N   0  0  0  0  0  0  0  0  0  0  0  0
   -9.9723   14.2710    0.3639 C   0  0  0  0  0  0  0  0  0  0  0  0
  -14.0963   11.8596   -0.5155 C   0  0  0  0  0  0  0  0  0  0  0  0
  -15.0859   10.9162   -0.7688 C   0  0  0  0  0  0  0  0  0  0  0  0
  -16.2587   11.3697   -1.3478 N   0  0  0  0  0  0  0  0  0  0  0  0
  -16.5102   12.6028   -1.6931 C   0  0  0  0  0  0  0  0  0  0  0  0
  -15.5482   13.5925   -1.4869 C   0  0  0  0  0  0  0  0  0  0  0  0
  -14.3720   13.2249   -0.9107 C   0  0  0  0  0  0  0  0  0  0  0  0
  -17.8113   12.9504   -2.3020 C   0  0  0  0  0  0  0  0  0  0  0  0
  -18.7748   12.1132   -2.5391 N   0  0  0  0  0  0  0  0  0  0  0  0
  -19.8640   12.6246   -3.0914 C   0  0  0  0  0  0  0  0  0  0  0  0
  -19.8106   13.9661   -3.3307 C   0  0  0  0  0  0  0  0  0  0  0  0
  -18.2954   14.5642   -2.8100 S   0  0  0  0  0  0  0  0  0  0  0  0
  -21.0438   11.8067   -3.4227 C   0  0  0  0  0  0  0  0  0  0  0  0
  -21.0411   10.4840   -3.1636 N   0  0  0  0  0  0  0  0  0  0  0  0
  -22.1192    9.6885   -3.5709 C   0  0  0  0  0  0  0  0  0  0  0  0
  -22.4994    9.6345   -4.9956 C   0  0  0  0  0  0  0  0  0  0  0  0
  -22.0203   12.3251   -3.9299 O   0  0  0  0  0  0  0  0  0  0  0  0
  -22.8032    8.9790   -2.6700 C   0  0  0  0  0  0  0  0  0  0  0  0
  -23.5371    8.8689   -5.3876 N   0  0  0  0  0  0  0  0  0  0  0  0
  -23.9145    8.8152   -6.8021 C   0  0  0  0  0  0  0  0  0  0  0  0
  -21.8766   10.2806   -5.8160 O   0  0  0  0  0  0  0  0  0  0  0  0
  -25.3701    8.4429   -6.9199 C   0  0  0  0  0  0  0  0  0  0  0  0
  -25.9413    8.3330   -8.1356 N   0  0  0  0  0  0  0  0  0  0  0  0
  -26.0274    8.2421   -5.9206 O   0  0  0  0  0  0  0  0  0  0  0  0
  -23.0605    7.7672   -7.5185 C   0  0  0  0  0  0  0  0  0  0  0  0
  -25.2625    8.5478   -9.4265 C   0  0  0  0  0  0  0  0  0  0  0  0
  -26.3970    8.9171  -10.4145 C   0  0  0  0  0  0  0  0  0  0  0  0
  -27.5484    8.0002   -9.9236 C   0  0  0  0  0  0  0  0  0  0  0  0
  -27.3431    7.9728   -8.3943 C   0  0  0  0  0  0  0  0  0  0  0  0
  -27.6311    6.5922   -7.8631 C   0  0  0  0  0  0  0  0  0  0  0  0
  -28.8604    6.0582   -8.0058 N   0  0  0  0  0  0  0  0  0  0  0  0
  -26.7568    5.9616   -7.3073 O   0  0  0  0  0  0  0  0  0  0  0  0
  -29.1595    4.8219   -7.4185 C   0  0  0  0  0  0  0  0  0  0  0  0
  -28.3949    3.6197   -7.8004 C   0  0  0  0  0  0  0  0  0  0  0  0
  -30.1369    4.7318   -6.5130 C   0  0  0  0  0  0  0  0  0  0  0  0
  -28.6826    2.4304   -7.2355 N   0  0  0  0  0  0  0  0  0  0  0  0
  -28.0112    1.2755   -7.6547 C   0  0  0  0  0  0  0  0  0  0  0  0
  -27.5048    3.7017   -8.6250 O   0  0  0  0  0  0  0  0  0  0  0  0
  -28.0814    0.8527   -9.0667 C   0  0  0  0  0  0  0  0  0  0  0  0
  -27.3073    0.5566   -6.7767 C   0  0  0  0  0  0  0  0  0  0  0  0
  -28.7224    1.5073   -9.8661 O   0  0  0  0  0  0  0  0  0  0  0  0
  -27.4351   -0.2590   -9.4702 N   0  0  0  0  0  0  0  0  0  0  0  0
  1  2  1  0      
  1  3  2  0      
  3  4  1  0      
  4  5  2  0      
  5  6  1  0      
  6  2  2  0      
  7  8  1  0      
  8  9  1  0      
 10  2  1  0      
  8 11  2  0      
 12  9  1  0      
 11 13  1  0      
  7 14  1  0      
 13 14  1  0      
 13 15  1  0      
 15 16  1  0      
 16 17  1  0      
 17 18  1  0      
 18 19  2  0      
 12 20  1  0      
 20 21  2  0      
 20 22  1  0      
 22 23  1  0      
  9 10  1  0      
 22 24  2  0      
 24 25  1  0      
 25 26  1  0      
 26 23  2  0      
 27 28  1  0      
 28 18  1  0      
 29 30  1  0      
 17 29  1  0      
 30 31  2  0      
 31 32  1  0      
 32 33  2  0      
 33 34  1  0      
 34 35  2  0      
 35 30  1  0      
 27 36  1  0      
 36 37  1  0      
 37 38  1  0      
 38 28  1  0      
 15 39  2  0      
 33 40  1  0      
 41 42  1  0      
 42 43  1  0      
 43 26  1  0      
 41 44  2  0      
 43 45  1  0      
 45 46  1  0      
 46 47  1  0      
 46 48  2  0      
 38 49  1  0      
 49 50  2  0      
 50 51  1  0      
 51 52  2  0      
 52 53  1  0      
 53 49  1  0      
 51 54  1  0      
 54 55  1  0      
 55 56  1  0      
 56 57  2  0      
 57 58  1  0      
 58 54  2  0      
 41 59  1  0      
 59 60  2  0      
 60 61  1  0      
 61 62  1  0      
 62 63  2  0      
 63 59  1  0      
 60 64  1  0      
 62 65  1  0      
 57 66  1  0      
 65 66  1  0      
 66 67  2  0      
 67 68  1  0      
 68 69  2  0      
 69 70  1  0      
 70 65  2  0      
 68 71  1  0      
 71 72  2  0      
 72 73  1  0      
 73 74  2  0      
 74 75  1  0      
 75 71  1  0      
 73 76  1  0      
 76 77  1  0      
 77 78  1  0      
 78 79  1  0      
 76 80  2  0      
 78 81  2  0      
 79 82  1  0      
 82 83  1  0      
 79 84  2  0      
 83 85  1  0      
 85 86  1  0      
 85 87  2  0      
 83 88  1  0      
 86 89  1  0      
 89 90  1  0      
 90 91  1  0      
 91 92  1  0      
 92 86  1  0      
 92 93  1  0      
 93 94  1  0      
 93 95  2  0      
 94 96  1  0      
 96 97  1  0      
 96 98  2  0      
 97 99  1  0      
 99100  1  0      
 97101  2  0      
100102  1  0      
100103  2  0      
102104  2  0      
102105  1  0      
M  END
$$$$
