# Supplementary material for: Kocurin, the True Structure of PM181104, an Anti-Methicillin-Resistant Staphylococcus aureus (MRSA) Thiazolyl Peptide from the Marine-Derived Bacterium Kocuria palustris
Source: MDPI journal article supplement (doi:10.3390/md11020387), 2013-02-04
Supplement: s3 [file s3]

marinedrugs-11-00387-s001.mol
  ChemDraw04241410122D

105116  0  0  0  0  0  0  0  0999 V2000
   -9.7213   -5.9186    0.0000 C   0  0  0  0  0  0  0  0  0  0  0  0
   -8.8963   -5.9186    0.0000 C   0  0  0  0  0  0  0  0  0  0  0  0
  -10.1338   -6.6330    0.0000 C   0  0  0  0  0  0  0  0  0  0  0  0
   -9.7213   -7.3475    0.0000 C   0  0  0  0  0  0  0  0  0  0  0  0
   -8.8963   -7.3475    0.0000 C   0  0  0  0  0  0  0  0  0  0  0  0
   -8.4838   -6.6330    0.0000 C   0  0  0  0  0  0  0  0  0  0  0  0
   -7.6588   -6.6330    0.0000 S   0  0  0  0  0  0  0  0  0  0  0  0
   -7.2463   -5.9186    0.0000 C   0  0  0  0  0  0  0  0  0  0  0  0
   -7.6588   -5.2041    0.0000 C   0  0  0  0  0  0  0  0  0  0  0  0
   -8.4838   -5.2041    0.0000 C   0  0  0  0  0  0  0  0  0  0  0  0
   -6.4213   -5.9186    0.0000 N   0  0  0  0  0  0  0  0  0  0  0  0
   -7.2463   -4.4896    0.0000 N   0  0  0  0  0  0  0  0  0  0  0  0
   -6.0088   -6.6330    0.0000 C   0  0  0  0  0  0  0  0  0  0  0  0
   -6.8131   -7.2386    0.0000 C   0  0  0  0  0  0  0  0  0  0  0  0
   -5.1838   -6.6330    0.0000 C   0  0  0  0  0  0  0  0  0  0  0  0
   -4.7713   -5.9186    0.0000 N   0  0  0  0  0  0  0  0  0  0  0  0
   -3.9463   -5.9186    0.0000 C   0  0  0  0  0  0  0  0  0  0  0  0
   -3.5338   -5.2041    0.0000 C   0  0  0  0  0  0  0  0  0  0  0  0
   -3.9463   -4.4896    0.0000 O   0  0  0  0  0  0  0  0  0  0  0  0
   -7.6588   -3.7752    0.0000 C   0  0  0  0  0  0  0  0  0  0  0  0
   -8.4838   -3.7752    0.0000 O   0  0  0  0  0  0  0  0  0  0  0  0
   -7.2463   -3.0607    0.0000 C   0  0  0  0  0  0  0  0  0  0  0  0
   -7.6588   -2.3462    0.0000 N   0  0  0  0  0  0  0  0  0  0  0  0
   -6.4393   -2.8892    0.0000 C   0  0  0  0  0  0  0  0  0  0  0  0
   -6.3531   -2.0687    0.0000 S   0  0  0  0  0  0  0  0  0  0  0  0
   -7.1067   -1.7331    0.0000 C   0  0  0  0  0  0  0  0  0  0  0  0
   -2.2963   -5.9186    0.0000 C   0  0  0  0  0  0  0  0  0  0  0  0
   -2.7088   -5.2041    0.0000 N   0  0  0  0  0  0  0  0  0  0  0  0
   -3.2244   -6.8261    0.0000 C   0  0  0  0  0  0  0  0  0  0  0  0
   -2.3994   -6.8261    0.0000 C   0  0  0  0  0  0  0  0  0  0  0  0
   -1.9869   -7.5405    0.0000 C   0  0  0  0  0  0  0  0  0  0  0  0
   -1.1619   -7.5405    0.0000 C   0  0  0  0  0  0  0  0  0  0  0  0
   -0.7494   -6.8261    0.0000 C   0  0  0  0  0  0  0  0  0  0  0  0
   -1.1619   -6.1116    0.0000 C   0  0  0  0  0  0  0  0  0  0  0  0
   -1.9869   -6.1116    0.0000 C   0  0  0  0  0  0  0  0  0  0  0  0
   -1.4893   -5.7470    0.0000 C   0  0  0  0  0  0  0  0  0  0  0  0
   -1.4031   -4.9266    0.0000 C   0  0  0  0  0  0  0  0  0  0  0  0
   -2.1567   -4.5910    0.0000 C   0  0  0  0  0  0  0  0  0  0  0  0
   -4.7713   -7.3475    0.0000 O   0  0  0  0  0  0  0  0  0  0  0  0
    0.0756   -6.8261    0.0000 O   0  0  0  0  0  0  0  0  0  0  0  0
   -5.8010   -1.4556    0.0000 C   0  0  0  0  0  0  0  0  0  0  0  0
   -6.2135   -0.7411    0.0000 N   0  0  0  0  0  0  0  0  0  0  0  0
   -7.0205   -0.9126    0.0000 C   0  0  0  0  0  0  0  0  0  0  0  0
   -6.0146   -2.2525    0.0000 O   0  0  0  0  0  0  0  0  0  0  0  0
   -7.7350   -0.5001    0.0000 C   0  0  0  0  0  0  0  0  0  0  0  0
   -8.4494   -0.9126    0.0000 C   0  0  0  0  0  0  0  0  0  0  0  0
   -9.1639   -0.5001    0.0000 N   0  0  0  0  0  0  0  0  0  0  0  0
   -8.4494   -1.7376    0.0000 O   0  0  0  0  0  0  0  0  0  0  0  0
   -2.3703   -3.7941    0.0000 C   0  0  0  0  0  0  0  0  0  0  0  0
   -1.8511   -3.1530    0.0000 N   0  0  0  0  0  0  0  0  0  0  0  0
   -2.3004   -2.4611    0.0000 C   0  0  0  0  0  0  0  0  0  0  0  0
   -3.0973   -2.6746    0.0000 C   0  0  0  0  0  0  0  0  0  0  0  0
   -3.1405   -3.4985    0.0000 S   0  0  0  0  0  0  0  0  0  0  0  0
   -1.8879   -1.7466    0.0000 C   0  0  0  0  0  0  0  0  0  0  0  0
   -1.0674   -1.6604    0.0000 S   0  0  0  0  0  0  0  0  0  0  0  0
   -0.8959   -0.8534    0.0000 C   0  0  0  0  0  0  0  0  0  0  0  0
   -1.6104   -0.4409    0.0000 C   0  0  0  0  0  0  0  0  0  0  0  0
   -2.2235   -0.9929    0.0000 N   0  0  0  0  0  0  0  0  0  0  0  0
   -4.9760   -1.4556    0.0000 C   0  0  0  0  0  0  0  0  0  0  0  0
   -4.4911   -2.1230    0.0000 C   0  0  0  0  0  0  0  0  0  0  0  0
   -3.7065   -1.8681    0.0000 O   0  0  0  0  0  0  0  0  0  0  0  0
   -3.7065   -1.0431    0.0000 C   0  0  0  0  0  0  0  0  0  0  0  0
   -4.4911   -0.7881    0.0000 N   0  0  0  0  0  0  0  0  0  0  0  0
   -4.4911   -2.9480    0.0000 C   0  0  0  0  0  0  0  0  0  0  0  0
   -3.1419   -0.0198    0.0000 C   0  0  0  0  0  0  0  0  0  0  0  0
   -2.3788   -0.0198    0.0000 C   0  0  0  0  0  0  0  0  0  0  0  0
   -1.9972    0.6411    0.0000 N   0  0  0  0  0  0  0  0  0  0  0  0
   -2.3788    1.3020    0.0000 C   0  0  0  0  0  0  0  0  0  0  0  0
   -3.1419    1.3020    0.0000 C   0  0  0  0  0  0  0  0  0  0  0  0
   -3.5235    0.6411    0.0000 C   0  0  0  0  0  0  0  0  0  0  0  0
   -1.9663    2.0164    0.0000 C   0  0  0  0  0  0  0  0  0  0  0  0
   -1.1458    2.1027    0.0000 N   0  0  0  0  0  0  0  0  0  0  0  0
   -0.9743    2.9096    0.0000 C   0  0  0  0  0  0  0  0  0  0  0  0
   -1.6887    3.3221    0.0000 C   0  0  0  0  0  0  0  0  0  0  0  0
   -2.3018    2.7701    0.0000 S   0  0  0  0  0  0  0  0  0  0  0  0
   -0.2598    3.3221    0.0000 C   0  0  0  0  0  0  0  0  0  0  0  0
    0.4547    2.9096    0.0000 N   0  0  0  0  0  0  0  0  0  0  0  0
    1.1692    3.3221    0.0000 C   0  0  0  0  0  0  0  0  0  0  0  0
    1.8836    2.9096    0.0000 C   0  0  0  0  0  0  0  0  0  0  0  0
   -0.0463    4.1190    0.0000 O   0  0  0  0  0  0  0  0  0  0  0  0
    1.3827    4.1190    0.0000 C   0  0  0  0  0  0  0  0  0  0  0  0
    2.5981    3.3221    0.0000 N   0  0  0  0  0  0  0  0  0  0  0  0
    3.3126    2.9096    0.0000 C   0  0  0  0  0  0  0  0  0  0  0  0
    1.6701    2.1127    0.0000 O   0  0  0  0  0  0  0  0  0  0  0  0
    4.0270    3.3221    0.0000 C   0  0  0  0  0  0  0  0  0  0  0  0
    4.7415    2.9096    0.0000 N   0  0  0  0  0  0  0  0  0  0  0  0
    4.2406    4.1190    0.0000 O   0  0  0  0  0  0  0  0  0  0  0  0
    3.0990    2.1127    0.0000 C   0  0  0  0  0  0  0  0  0  0  0  0
    4.8277    2.0892    0.0000 C   0  0  0  0  0  0  0  0  0  0  0  0
    5.6347    1.9176    0.0000 C   0  0  0  0  0  0  0  0  0  0  0  0
    6.0472    2.6321    0.0000 C   0  0  0  0  0  0  0  0  0  0  0  0
    5.4952    3.2452    0.0000 C   0  0  0  0  0  0  0  0  0  0  0  0
    5.7087    4.0421    0.0000 C   0  0  0  0  0  0  0  0  0  0  0  0
    6.5056    4.2556    0.0000 N   0  0  0  0  0  0  0  0  0  0  0  0
    5.2962    4.7565    0.0000 O   0  0  0  0  0  0  0  0  0  0  0  0
    6.9181    4.9701    0.0000 C   0  0  0  0  0  0  0  0  0  0  0  0
    7.7150    5.1836    0.0000 C   0  0  0  0  0  0  0  0  0  0  0  0
    6.5056    5.6845    0.0000 C   0  0  0  0  0  0  0  0  0  0  0  0
    8.1275    5.8981    0.0000 N   0  0  0  0  0  0  0  0  0  0  0  0
    8.9244    6.1116    0.0000 C   0  0  0  0  0  0  0  0  0  0  0  0
    8.1275    4.4691    0.0000 O   0  0  0  0  0  0  0  0  0  0  0  0
    9.3369    6.8261    0.0000 C   0  0  0  0  0  0  0  0  0  0  0  0
    9.3369    5.3971    0.0000 C   0  0  0  0  0  0  0  0  0  0  0  0
    8.9244    7.5405    0.0000 O   0  0  0  0  0  0  0  0  0  0  0  0
   10.1338    7.0396    0.0000 N   0  0  0  0  0  0  0  0  0  0  0  0
  1  2  1  0      
  1  3  2  0      
  3  4  1  0      
  4  5  2  0      
  5  6  1  0      
  6  2  2  0      
  7  8  1  0      
  8  9  1  0      
 10  2  1  0      
  8 11  2  0      
 12  9  1  0      
 11 13  1  0      
  7 14  1  0      
 13 14  1  6      
 13 15  1  0      
 15 16  1  0      
 16 17  1  0      
 17 18  1  0      
 18 19  2  0      
 12 20  1  0      
 20 21  2  0      
 20 22  1  0      
 22 23  1  0      
  9 10  1  6      
 22 24  2  0      
 24 25  1  0      
 25 26  1  0      
 26 23  2  0      
 27 28  1  0      
 28 18  1  0      
 29 30  1  0      
 17 29  1  6      
 30 31  2  0      
 31 32  1  0      
 32 33  2  0      
 33 34  1  0      
 34 35  2  0      
 35 30  1  0      
 27 36  1  0      
 36 37  1  0      
 37 38  1  0      
 38 28  1  0      
 15 39  2  0      
 33 40  1  0      
 41 42  1  0      
 42 43  1  0      
 43 26  1  0      
 41 44  2  0      
 43 45  1  6      
 45 46  1  0      
 46 47  1  0      
 46 48  2  0      
 38 49  1  6      
 49 50  2  0      
 50 51  1  0      
 51 52  2  0      
 52 53  1  0      
 53 49  1  0      
 51 54  1  0      
 54 55  1  0      
 55 56  1  0      
 56 57  2  0      
 57 58  1  0      
 58 54  2  0      
 41 59  1  0      
 59 60  2  0      
 60 61  1  0      
 61 62  1  0      
 62 63  2  0      
 63 59  1  0      
 60 64  1  0      
 62 65  1  0      
 57 66  1  0      
 65 66  1  0      
 66 67  2  0      
 67 68  1  0      
 68 69  2  0      
 69 70  1  0      
 70 65  2  0      
 68 71  1  0      
 71 72  2  0      
 72 73  1  0      
 73 74  2  0      
 74 75  1  0      
 75 71  1  0      
 73 76  1  0      
 76 77  1  0      
 77 78  1  0      
 78 79  1  0      
 76 80  2  0      
 78 81  2  0      
 79 82  1  0      
 82 83  1  0      
 79 84  2  0      
 83 85  1  0      
 85 86  1  0      
 85 87  2  0      
 83 88  1  6      
 86 89  1  0      
 89 90  1  0      
 90 91  1  0      
 91 92  1  0      
 92 86  1  0      
 92 93  1  6      
 93 94  1  0      
 93 95  2  0      
 94 96  1  0      
 96 97  1  0      
 96 98  2  0      
 97 99  1  0      
 99100  1  0      
 97101  2  0      
100102  1  0      
100103  2  0      
102104  2  0      
102105  1  0      
M  END
